# Supplementary material for: Hospital in-reach family-centred social prescribing pilot for children with neurodisability: mixed methods evaluation with social return on investment analysis
Source: Springer Nature journal article supplement (doi:10.1186/s12913-025-12329-0), 2025-01-30

# Figure S1

Social Return On Investment Logic Model

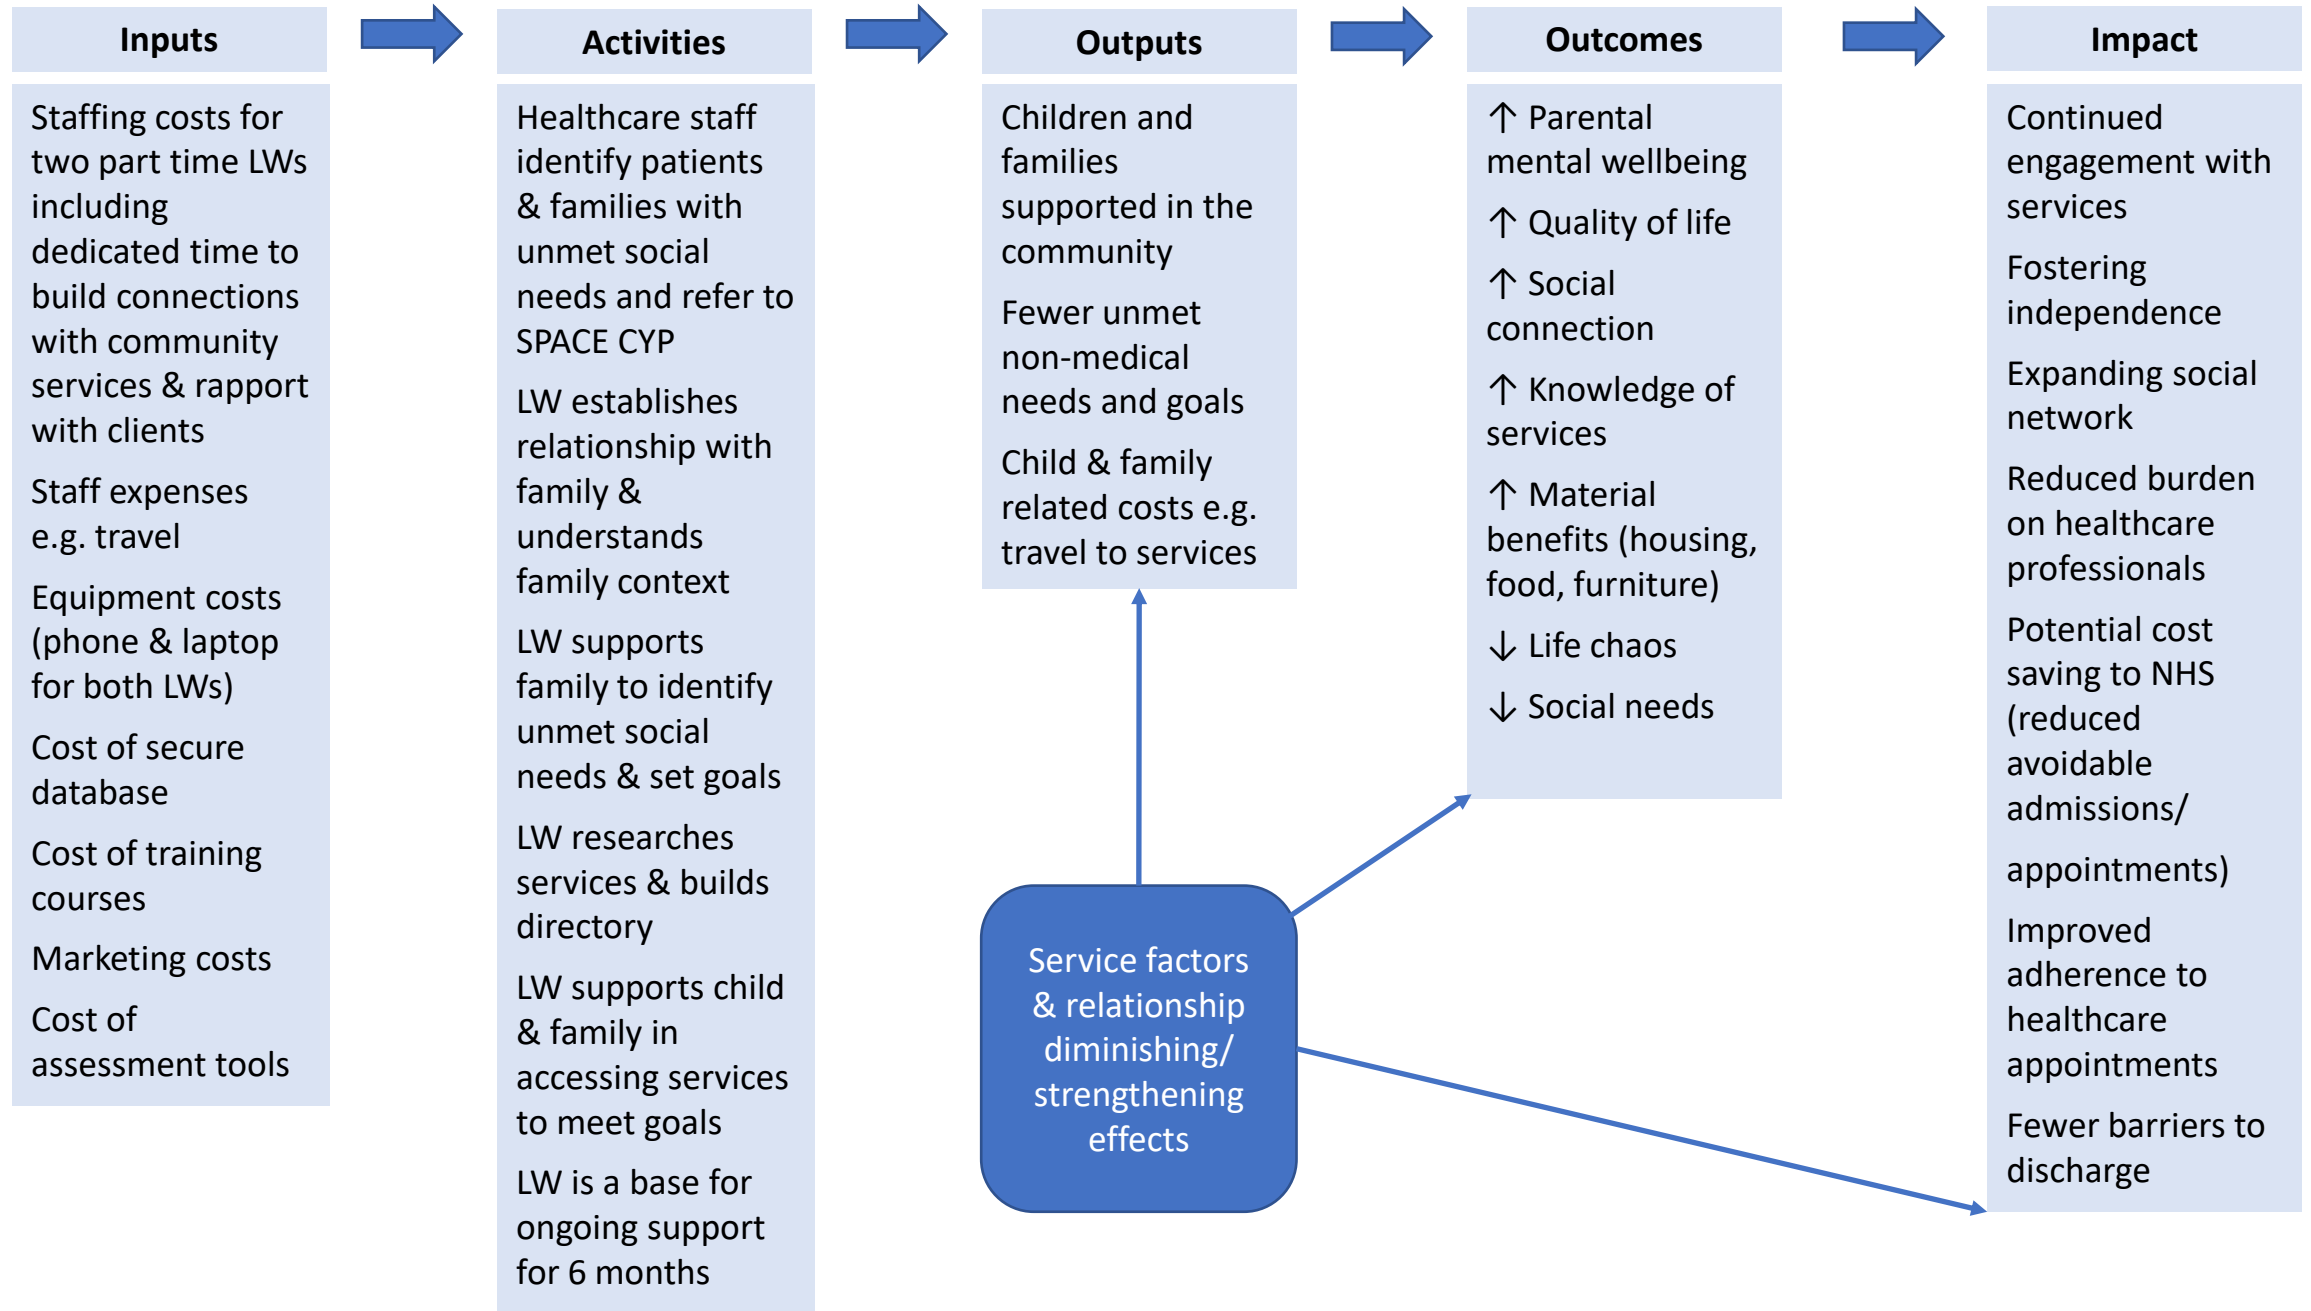

Supplement: MOESM1 [file 12913_2025_12329_MOESM1_ESM.pdf]
